# Supplementary material for: Carbapenem-Resistant Enterobacteriaceae (CRE) among Children with Cancer: Predictors of Mortality and Treatment Outcome
Source: MDPI journal article supplement (doi:10.3390/antibiotics12020405), 2023-02-17
Supplement: s1 [file s1]

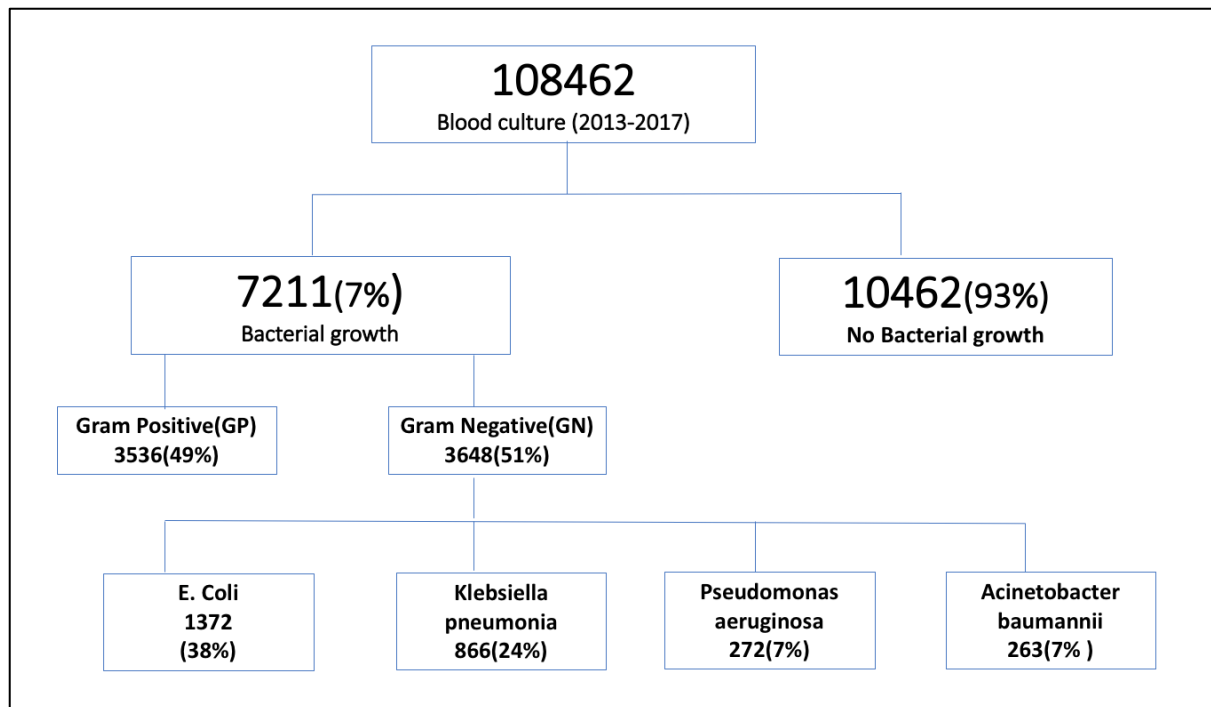

**Figure S1: The numbers of blood cultures and the number of positive blood cultures during study period (2013-2017).**

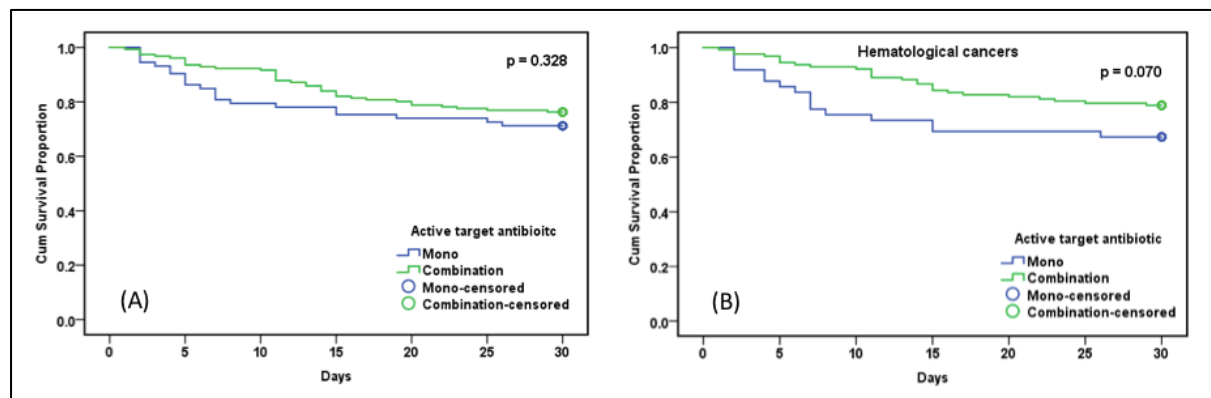

**Figure S2: Impact of combination antibacterial treatment versus monotherapy on day 30 mortality (A) among the whole group hematological and solid malignancies (B) patients with hematological malignancies only.**
